# Supplementary material for: “Unraveling the Gut Microbiota Composition of the Genus Herichthys (Cichliformes:Pisces)”
Source: Research Square preprint supplement (doi:10.21203/rs.3.rs-348729/v1), 2021-03-30
Supplement: Supplementary file 1 [file b7f4949ae8186a9fa483d8a1.xlsx]

## Sheet: Hoja1
Table S2. Multiple pairwise comparison tests among Herichtys species obtained from the PERMANOVA analysis for the three distance metrics used, Bray Curtis, Unifrac weighted and Unifrac weighted. The probability values obtained from the analysis and the probability values after Bonferroni corrections are presented
	Bray Curtis distance		Unifrac weighted distance		Unifrac unweighted distance
pairwise comparison	p value	p value after Bonferroni correction	p value	p value after Bonferroni correction	p value	p value after Bonferroni correction
H. tamasopoensis vs H. steindachneri	0.1	1	0.0905068	0.9	0.0735484	0.9
H. tamasopoensis vs H. H. tepehua	0.1	1	0.163065	0.6	0.138966	0.8
H. tamasopoensis vs H. deppii	0.1	1	0.170209	0.7	0.167521	0.7
H. tamasopoensis vs H. bartoni	0.1	1	0.105929	0.9	0.0597357	1
H. tamasopoensis vs H. cyanoguttatus	0.1	1	0.187017	0.5	0.119105	0.8
H. tamasopoensis vs H. pantostictus	0.02*	0.88	0.0517776	0.562	0.03*	0.778
H. tamasopoensis vs H. carpintis	0.03*	1	0.05*	0.635	0.02*	0.981
H. tamasopoensis vs H. labridens	0.1	1	0.204277	0.4	0.181442	0.5
H. tamasopoensis vs H. minckleyi	0.25	1	0.416634	0.25	0.516954	0.25
H. tamasopoensis vs H. pame	0.1	1	0.255764	0.3	0.19283	0.4
H. steindachneri vs H. H. tepehua	0.1	1	0.151545	0.8	0.133952	1
H. steindachneri vs H. deppii	0.2	1	0.227035	0.5	0.22849	0.6
H. steindachneri vs H. bartoni	0.4	1	0.157233	0.8	0.144657	0.7
H. steindachneri vs H. cyanoguttatus	0.1	1	0.287404	0.2	0.239543	0.6
H. steindachneri vs H. pantostictus	0.05*	1	0.0722542	0.413	0.0685771	0.437
H. steindachneri vs H. carpintis	0.183	1	0.0922819	0.232	0.0806779	0.33
H. steindachneri vs H. labridens	0.1	1	0.299491	0.2	0.281727	0.3
H. steindachneri vs H. minckleyi	0.25	1	0.513156	0.25	0.488184	0.25
H. steindachneri vs H. pame	0.4	1	0.265971	0.4	0.214786	0.5
H. tepehua vs H. deppii	0.1	1	0.159652	0.8	0.18285	0.8
H. tepehua vs H. bartoni	0.2	1	0.162677	0.5	0.15179	0.5
H. tepehua vs H. cyanoguttatus	0.1	1	0.230688	0.3	0.198337	0.6
H. tepehua vs H. pantostictus	0.04*	1	0.0863905	0.32	0.094726	0.296
H.tepehua vs H. carpintis	0.111	1	0.150474	0.093	0.153155	0.05
H.tepehua vs H. labridens	0.1	1	0.205396	0.5	0.225157	0.5
H.tepehua vs H. minckleyi	0.25	1	0.240362	0.5	0.24266	0.5
H. tepehua vs H. pame	0.2	1	0.138935	0.6	0.158897	0.6
H. deppii vs H. bartoni	0.7	1	0.11287	1	0.13597	0.8
H. deppii vs H. cyanoguttatus	0.3	1	0.177332	0.6	0.189639	0.7
H. deppii vs H. pantostictus	0.458	1	0.04*	0.852	0.0569017	0.656
H. deppii vs H. carpintis	0.005*	0.275	0.03*	0.898	0.04*	0.888
H. deppii vs H. labridens	0.1	1	0.196829	0.6	0.234508	0.5
H. deppii vs H. minckleyi	0.25	1	0.394576	0.666667	0.422145	0.666667
H. deppii vs H. pame	0.5	1	0.25767	0.4	0.26473	0.4
H. bartoni vs H. cyanoguttatus	0.1	1	0.112651	0.9	0.0852148	0.8
H. bartoni vs H. pantostictus	0.57	1	0.03*	0.68	0.02*	0.783
H. bartoni vs H. carpintis	0.075	1	0.04*	0.682	0.04*	0.844
H. bartoni vs H. labridens	0.1	1	0.136703	0.6	0.141995	0.5
H. bartoni vs H. minckleyi	0.25	1	0.245376	0.5	0.326665	0.5
H. bartoni vs H. pame	0.5	1	0.195114	0.4	0.142056	0.6
H. cyanoguttatus vs H. pantostictus	0.014*	0.77	0.04*	0.677	0.01*	0.945
H. cyanoguttatus vs H. carpintis	0.006*	0.33	0.0550511	0.502	0.02*	1
H. cyanoguttatus vs H. labridens	0.1	1	0.239183	0.5	0.173748	0.5
H. cyanoguttatus vs H. minckleyi	0.25	1	0.282049	0.5	0.382948	0.5
H. cyanoguttatus vs H. pame	0.1	1	0.37895	0.1	0.297586	0.3
H. pantostictus vs H. carpintis	0.004*	0.22	0.04*	0.331	0.0611985	0.223
H. pantostictus vs H. labridens	0.038*	1	0.05*	0.567	0.0643301	0.472
H. pantostictus vs H. minckleyi	0.08	1	0.0611546	0.52	0.078211	0.403
H. pantostictus vs H. pame	0.909	1	0.0997442	0.279	0.10107	0.296
H. carpintis vs H. labridens	0.005*	0.275	0.0719662	0.334	0.0765456	0.301
H. carpintis vs H. minckleyi	0.154	1	0.0937193	0.302	0.0812653	0.327
H. carpintis vs H. pame	0.272	1	0.175305	0.039	0.167228	0.028
H. labridens vs H. minckleyi	0.5	1	0.420115	0.5	0.375838	0.5
H. labridens vs H. pame	0.4	1	0.255925	0.2	0.271052	0.2
H. minckleyi vs H. pame	0.25	1	0.464006	0.25	0.417678	0.5
